# Supplementary material for: Active Lysogeny in Listeria Monocytogenes Is a Bacteria-Phage Adaptive Response in the Mammalian Environment
Source: PubMed Central journal article supplement — Cell Rep. 2020 Jul 28;32(4):107956. doi: 10.1016/j.celrep.2020.107956 (PMC7397523; doi:10.1016/j.celrep.2020.107956), 2020-07-28
Supplement: mmc1.pdf [file mmc1.pdf]

Cell Reports, Volume 32

## Supplemental Information

**Active Lysogeny in *Listeria Monocytogenes***

**Is a Bacteria-Phage Adaptive Response**

**in the Mammalian Environment**

**Anna Pasechnek, Lev Rabinovich, Olga Stadnyuk, Gil Azulay, Jessica Mioduser, Tal Argov, Ilya Borovok, Nadejda Sigal, and Anat A. Herskovits**

**A**

```

      10      20      30      40      50
LlgA_10403S  MGQLFNLQVEDINVIQTVRAVRKFFKDYLLRLVMAGSRKLPMTTTYKL
LlgA_EGD-e  MGQLFNLQVEDINVIQTVRAVRKFFKDYLLRLVMAGSRKLPMTTTYKL
LlgA_08-5578 MGQLFNLQVEDINVIQTVRAVRKFFKDYLLRLVMAGSRKLPMTTTYKL
LlgA_ATCC33091 MGQLFNLQVEDINVIQTVRAVRKFFKDYLLRLVMAGSRKLPMTTTYKL
Gp66_A118   MGQLFNLQVEDINVIQTVRAVRKFFKDYLLRLVMAGSRKLPMTTTYKI
LlgA_Lseeliger MEQLFNLQVEDINVIQTVRAVRKFFKDYLLRLVMAGSRKLPMTTTYKI
LlgA_PNUSAL005214 MGQLFNLPHTKDINVMETVRAVRKFFKDYLLRLVMAGDRKFPMTTTYKI
LlgA_FDA00008492 MGQLFNLQTKDINVMETVRAVRKFFKDYLLRLVMAGDRKFPMTTTYKI
* ***** :****:*** *.:*****: **.***.*.*:.* **
      60      70      80      90     100
LlgA_10403S  TPPNFSNEFHskVEDAAIHNVdNVHAAQEAVKKYDAILNQLVHHRKILF
LlgA_EGD-e  TPPNFSNEFHskVEDAAIHNVdNVHAAQEAVKKYDAILNQLVHHRKILF
LlgA_08-5578 TPPNFSNEFHskVEDAAIHNVdNVHAAQEAVKKYDAILNQLVHHRKILF
LlgA_ATCC33091 TPPNFSNEFHskVEDAAIHNVdNVHAAQEAVKKYDAILNQLVHHRKILF
Gp66_A118   TPPNFSNEFHskVEDAAIHNVdNVHAAQEAVKKYDAILNQLVHHRKILF
LlgA_Lseeliger TPPNFSNEFHskVEDAAIHNVdNVHAAQEAVKKYDAILNQLVHHRKILF
LlgA_PNUSAL005214 TPPNFSNEFHskVEDAAIHNVdNVHAAQEAVKKYDAILNQLVHHRKILF
LlgA_FDA00008492 TPPNFSNEFHskVEDAAIHNVdNVHAAQEAVKKYDAILNQLVHHRKILF
*****
      110     120     130     140
LlgA_10403S  EKFIHNLQDITIMLDIPYEEQYKREKRKAVIELATTLGIEVLN
LlgA_EGD-e  EKFIHNLQDITIMLDIPYEEQYKREKRKAVIELATTLGIEVLN
LlgA_08-5578 EKFIHNLQDITIMLDIPYEEQYKREKRKAVIELATTLGIEVLN
LlgA_ATCC33091 EKFIHNLQDITIMLDIPYEEQYKREKRKAVIELATTLGIEVLN
Gp66_A118   EKFIHNLQDRTIMLDIPYEEQYKREKRKAVIELATTLGIEVLN
LlgA_Lseeliger EKYIHNYQDVIMIDIPYEEQYKREKRKAVIELATTLNIEVLN
LlgA_PNUSAL005214 EKFIHNYQDVIIMIDIPYEEQYKREKRKAVIELATTLGIEVLN
LlgA_FDA00008492 EKYIYDYQDKTIMNDIPYEEQYKREKRKAVIELATTLGIEVLN
**.:. * .: * *****:***** * *****

```

**B**

```

      10      20      30      40      50
LlgA_10403S  MGQLFNLQVEDINVIQTVRAVRKFFKDYLLRLVMAGSRKLPMTTTYKL
Gp62_A500   MGQLFNLQVEDINVIQTVRAVRKFFKDYLLRLVMAGSRKLPMTTTYKL
LP030_3_023 MGQLFNLQVEDINVIQTVRAVRKFFKDYLLRLVMAGSRKLPMTTTYKL
LlgA_lin0101 MGQLFNLQVEDINVIQTVRAVRKFFKDYLLRLVMAGDRKFPMTTTYKI
LlgA_tRNAThr MGQLFNLQVEDINVIQTVRAVRKFFKDYLLRLVMAGDRKFPMTTTYKI
Gp59_A006   MGQLFNLQVEDINVIQTVRAVRKFFKDYLLRLVMAGDRKFPMTTTYKI
LlgA_rpsI   MEQLFNLQVEDINVIQTVRAVRKFFKDYLLRLVMAGDRKFPMTTTYKI
LlgA_tRNALeu MEQLFNLPEVKDINVIQTVRAVRKFFKDYLLRLVMAGSCKLPMTTTYKI
* *****.:*****: :*****: * **.*.*.*** **
      60      70      80      90     100
LlgA_10403S  TPPNFSNEFHskVEDAAIHNVdNVHAAQEAVKKYDAILNQLVHHRKILF
Gp62_A500   TPPNFSNEFHskVEDAAIHNVdNVHAAQEAIKKYDAILNQLVHHRKILF
LP030_3_023 TPPNFSNEFHskVEDAAIHNVdNVHAAQEAIKKYDAILNQLVHHRKILF
LlgA_lin0101 TPPNFSNEFHskVEDAAIHNVdNVHAAQEAVKKYDAILNQLVHHRKILF
LlgA_tRNAThr TPPNFSNEFHskVEDAAIHNVdNVHAAQEAVKKYDAILNQLVHHRKILF
Gp59_A006   TPPNFSNEFHskVEDAAIHNVdNVHAAQEAVKKYDAILNQLVHHRKILF
LlgA_rpsI   TPPNFSNEFHskVEDAAIHNVdNVHAAQEAVKKYDAILNQLVHHRKILF
LlgA_tRNALeu TPPNFSNEFHskVEDAAIHNVdNVHAAQESVKRYEAILNQLDHHHRKILF
***.*****:*****:***.:*.*.*.*.* **
      110     120     130     140
LlgA_10403S  EKFIHNLQDITIMLDIPYEEQYKREKRKAVIELATTLGIEVLN
Gp62_A500   EKFIHNLQDITIMLDIPYEEQYKREKRKAVIELATTLGIEVLN
LP030_3_023 EKFIHNLQDITIMLDIPYEEQYKREKRKAVIELATTLGIEVLN
LlgA_lin0101 EKFIHNLQDITIMLDIPYEEQYKREKRKAVIELATTLGIEVLN
LlgA_tRNAThr EKFIHNLQDITIMLDIPYEEQYKREKRKAVIELATTLGIEVLN
Gp59_A006   EKFIHNLQDRTIMLDIPYEEQYKREKRKAVIELATTLGIEVLN
LlgA_rpsI   EKYIYDYKDKIIMIDIPYEEQYKREKRKAVIELATTLGIEVLN
LlgA_tRNALeu EKYIHGYQDKEIMLDIPYEEQYKREKRKAVIELATTLGIEVLN
**.:. * .: * *****:*****:***** *****

```

**Figure S1. Comparison of  $\phi$ 10403S LlgA orthologs. Related to Figure 6. A.** Comparison of  $\phi$ 10403S LlgA orthologs encoded by selected *comK* associated prophages of *Listeria*. Alignment length: 144 residues. Identical residues (marked with asterisks and shown in red) are 75.69 % (109/144), strongly similar residues (marked with colons and shown in green) are 13.89 % (20/144), weakly similar (marked with dots and shown in blue) are 3.47 % (5/144), and different are 6.94 % (10/144). LlgA\_10403S (LMRG\_01529, 144 aa), *comK* associated prophage  $\phi$ 10403S, *L. monocytogenes* str. 10403S. LlgA\_EGD-e (lmo2303, 144 aa), *comK* associated prophage, *L. monocytogenes* str. EGD-e. LlgA\_08-5578 (LM5578\_2501, 144 aa), *comK* associated prophage, *L. monocytogenes* str. 08-5578. LlgA\_ATCC33091 (EHN62215.1, 144 aa), *comK* associated prophage, *L. innocua* str. ATCC 33091. Gp66\_A118 (Gp66, NP\_463531.1, 144 aa), *comK* associated *Listeria* phage A118. LlgA\_Lseeliger (OLQ23568.1, 144 aa), *comK* associated prophage, *L. seeligeri* str. BCW\_4759. LlgA\_PNUSAL005214 (ECK6838613.1, 144 aa), *comK* associated prophage, *L. monocytogenes* str. PNUSAL005214. LlgA\_FDA00008492 (EAC8843104.1, 144 aa), *L. monocytogenes* str. FDA00008492. **B.** Comparison of  $\phi$ 10403S LlgA orthologs encoded by selected non-*comK* associated prophages of *Listeria*. Alignment length: 144 residues. Identical residues (marked with asterisks and shown in red) are 70.14 % (101/144), strongly similar residues (marked with colons and shown in green) are 15.97 % (23/144), weakly similar (marked with dots and shown in blue) are 3.47 % (5/144), and different are 10.42 % (15/144). LlgA\_10403S (144 aa, LMRG\_01529), *comK* gene prophage  $\phi$ 10403S, *L. monocytogenes* str. 10403S. Gp62\_A500 (144 aa, Gp62, YP\_001468447.1), tRNA-Lys gene *Listeria* phage A500. LP030\_3\_023 (144 aa, YP\_009044669.1), tRNA-Lys gene *Listeria* phage LP-030-3. LlgA\_lin0101 (144 aa, lin0101), tRNA-Lys gene prophage, *L. innocua* str. Clip11262. LlgA\_tRNAThr (144 aa, LMOSLCC7179\_2533), tRNA-Thr gene prophage, *L. monocytogenes* SLCC 7179 (serotype 3a). Gp59\_A006 1 (144 aa, Gp59, YP\_001468899.1), tRNA-Arg gene *Listeria* phage A006. LlgA\_rpsI (144 aa, EAV9834825.1), *rpsI* gene prophage, *L. monocytogenes* L7-0863. LlgA\_tRNALeu (144 aa, EAC7181297.1), tRNA-Leu prophage, *L. monocytogenes* PNUSAL001712 (serotype 4b).

**Table S1. Lytic induction of  $\phi$ 10403S and  $\phi$ EGDe *comK*-prophages by mitomycin C. Related to Figure 1.**

| <b>Strain/treatment</b> | <b>PFU/ml</b> | <b>STD</b> |
|-------------------------|---------------|------------|
| <i>Lm</i> 10403S -MC    | 108,500       | 48,000     |
| <i>Lm</i> 10403S +MC    | 444,500,000   | 55,700,00  |
| <i>Lm</i> EGDe -MC      | 0             | 0          |
| <i>Lm</i> EGDe +MC      | 15            | 21         |

**Table S2: A list of  $\phi$ 10403S genes and annotations. Related to Figure 2A.**

| Gene                 | Strand | Annotation/Putative function                                                            | Detected transcripts<br>(by RNA-seq) | Ortholog in<br>A118 |
|----------------------|--------|-----------------------------------------------------------------------------------------|--------------------------------------|---------------------|
| LMRG_01560           | +      | N-terminus of competence regulator ComK                                                 |                                      |                     |
| LMRG_01559           | -      | Conserved hypothetical protein                                                          | +                                    | -                   |
| LMRG_01558           | -      | Conserved hypothetical protein                                                          | +                                    | -                   |
| <i>rli43</i> -like*  | -      | Ortholog of Rli43 of <i>Lm</i> EGDe                                                     | -                                    | -                   |
| LMRG_01557           | -      | Putative secreted protein                                                               | -                                    | -                   |
| <i>rli34</i> -like*  | +      | Rli34 ortholog of <i>Lm</i> EGDe                                                        | -                                    | -                   |
| LMRG_01556           | -      | Putative acetyltransferase                                                              | +                                    | gp27                |
| LMRG_01555           | -      | Conserved hypothetical protein                                                          | +                                    | gp26                |
| LMRG_01554           | -      | Endolysin                                                                               | +                                    | gp25                |
| LMRG_01553           | -      | Holin                                                                                   | +                                    | gp24                |
| LMRG_01552           | -      | Membrane-associated protein                                                             | +                                    | gp23                |
| LMRG_01551           | -      | Conserved hypothetical protein                                                          | +                                    | gp22                |
| LMRG_01550           | -      | Hypothetical protein                                                                    | +                                    | gp21                |
| LMRG_01549           | -      | Secreted receptor-binding protein (RBP)                                                 | +                                    | gp20                |
| LMRG_01548           | -      | Secreted pectin-lyase-fold protein                                                      | +                                    | gp19                |
| LMRG_01547           | -      | Tail or base plate protein with a putative endopeptidase activity                       | +                                    | gp18                |
| LMRG_01546           | -      | Tail protein                                                                            | +                                    | gp17                |
| LMRG_01545           | -      | Tape-measure protein                                                                    | +                                    | gp16                |
| LMRG_01544           | -      | Conserved hypothetical protein                                                          | +                                    | gp15                |
| LMRG_01543           | -      | Tail assembly chaperone protein                                                         | +                                    | gp14                |
| LMRG_01542           | -      | Cell surface and adhesion associated protein                                            | +                                    | gp13                |
| LMRG_01541           | -      | Conserved hypothetical protein                                                          | +                                    | gp12                |
| LMRG_01540           | -      | Minor capsid protein                                                                    | +                                    | gp11                |
| LMRG_01539           | -      | Minor capsid protein                                                                    | +                                    | gp10                |
| LMRG_01538           | -      | Minor capsid protein                                                                    | +                                    | gp9                 |
| LMRG_01537           | -      | Head-tail connector protein YqBG                                                        | +                                    | gp8                 |
| LMRG_01536           | -      | Capsid protein                                                                          | +                                    | -                   |
| LMRG_01535           | -      | Minor structural protein of GP20-family, scaffolding protein                            | +                                    | gp5                 |
| LMRG_01534           | -      | Minor capsid protein                                                                    | +                                    | gp4                 |
| LMRG_01533           | -      | Portal protein                                                                          | +                                    | gp3                 |
| LMRG_01532           | -      | Terminase large subunit, TerL, XtmB family                                              | +                                    | gp2                 |
| LMRG_01531           | -      | Terminase small subunit, TerS, XtmA family                                              | +                                    | gp1                 |
| LMRG_01530           | -      | Membrane-associated protein                                                             | +                                    | gp68                |
| <i>rliG</i> -like*   | -      | RliG ortholog of <i>Lm</i> EGDe                                                         | +                                    | *                   |
| LMRG_01529           | -      | Late lytic genes activator, LlgA, transcriptional regulatory protein of the ArpU family | +                                    | gp66                |
| LMRG_01528           | -      | Conserved hypothetical protein                                                          | +                                    | gp65                |
| LMRG_02921           | -      | Conserved hypothetical protein                                                          | +                                    | -                   |
| LMRG_01527           | -      | Conserved hypothetical protein                                                          | +                                    | -                   |
| LMRG_01526           | -      | DnaD-like DNA replication protein, replicase                                            | +                                    | gp49                |
| LMRG_01525           | -      | Recombinational DNA repair protein RecT, recombinase                                    | +                                    | gp48                |
| LMRG_01524           | -      | Predicted endonuclease                                                                  | +                                    | gp47                |
| <i>rli99</i> -like*  | +      | Rli99 ortholog of <i>Lm</i> EGDe                                                        | -                                    | -                   |
| <i>rli140</i> -like* | -      | Rli140 ortholog of <i>Lm</i> EGDe                                                       | +                                    | -                   |
| gp46-like*           | -      | Hypothetical protein                                                                    | -                                    | gp46                |
| LMRG_01510           | +      | C-terminus of competence regulator ComK                                                 |                                      |                     |

**Table S2: continued**

|                      |   |                                                                                                                                                    |   |          |
|----------------------|---|----------------------------------------------------------------------------------------------------------------------------------------------------|---|----------|
| LMRG_01523           | - | Conserved tail-fibre system protein                                                                                                                | + | gp45     |
| LMRG_01522           | - | Recombination Directionality Factor (RDF)                                                                                                          | + | gp44     |
| LMRG_01521           | - | Conserved hypothetical protein                                                                                                                     | + | gp43     |
| LMRG_02920           | - | Putative anti-repressor protein                                                                                                                    | + | gp42     |
| lasRNA-like*         | + | Long anti-sense RNA of LMRG_01516-01517-01518-02984 as identified in EGDe <i>comK</i> -prophage. Includes a putative ORF similar to gp41-1 of A118 | + | -        |
| LMRG_02984           | - | Putative membrane-associated protein                                                                                                               | + | *        |
| LMRG_01518           | - | Hypothetical protein                                                                                                                               | + | gp41     |
| LMRG_01517           | - | Conserved hypothetical protein                                                                                                                     | + | -        |
| LMRG_01516           | - | Conserved hypothetical protein                                                                                                                     | + | -        |
| LMRG_01515           | - | Cro-like transcriptional regulator, XRE-family protein                                                                                             | + | gp36-1** |
| LMRG_01514           | + | CI-like transcriptional regulator, XRE-family protein                                                                                              | + | gp36**   |
| <i>rli141</i> -like* | + | Rli141 ortholog of <i>Lm</i> EGDe                                                                                                                  | - | -        |
| LMRG_02918           | + | Conserved hypothetical protein                                                                                                                     | + | -        |
| LMRG_01513           | + | Putative secreted Lpt-like lipoprotein                                                                                                             | + | gp32     |
| LMRG_01512           | + | Putative DNA helicase                                                                                                                              | + | -        |
| LMRG_01511           | + | Site-specific phage serine integrase                                                                                                               | + | gp31     |

\* present but not annotated

\*\* low similarity

**Table S3.  $\phi$ 10403S transcriptional response under lysogenic and lytic conditions. Related to Figure 2B-C.**

| Transcription Start | Translation Start | Translation Stop | Transcription Stop | Strand | Genes      | Time post UV irradiation |     |     |     |     |     |
|---------------------|-------------------|------------------|--------------------|--------|------------|--------------------------|-----|-----|-----|-----|-----|
|                     |                   |                  |                    |        |            | 0h                       | 1h  | 2h  | 3h  | 4h  | 5h  |
|                     | 2357429           | 2357878          |                    | +      | comk C'    | 7                        | 7   | 9   | 5   | 4   | 1   |
|                     | 2356053           | 2357411          | 2357411            | +      | LMRG_01511 | 58                       | 40  | 40  | 49  | 50  | 24  |
| 2354478             | 2354478           | 2355992          | 2355992            | +      | LMRG_01512 | 29                       | 33  | 26  | 27  | 31  | 15  |
| 2353710             | 2353710           | 2354246          |                    | +      | LMRG_01513 | 41                       | 77  | 59  | 31  | 31  | 21  |
| 2353494             | 2353494           | 2353661          |                    | +      | LMRG_02918 | 24                       | 55  | 38  | 24  | 24  | 16  |
| 2352860             | 2352860           | 2353336          | 2353336            | +      | LMRG_01514 | 79                       | 134 | 102 | 34  | 31  | 20  |
| 2352691             | 2352691           | 2352488          | 2352488            | -      | LMRG_01515 | 14                       | 32  | 109 | 195 | 312 | 226 |
| 2352487             | 2352455           | 2352261          | 2352250            | -      | LMRG_01516 | 16                       | 37  | 120 | 268 | 427 | 318 |
| 2352249             | 2352249           | 2351965          | 2351947            | -      | LMRG_01517 | 19                       | 50  | 149 | 336 | 520 | 397 |
| 2351946             | 2351939           | 2351658          | 2351653            | -      | LMRG_01518 | 15                       | 43  | 130 | 302 | 450 | 371 |
| 2351632             |                   |                  | 2351664            | +      | lasRNA     | 388                      | 83  | 125 | 283 | 371 | 452 |
| 2351652             | 2351652           | 2351377          |                    | -      | LMRG_02984 | 17                       | 52  | 161 | 351 | 579 | 438 |
|                     | 2351395           | 2350616          | 2350576            | -      | LMRG_02920 | 25                       | 53  | 176 | 379 | 554 | 425 |
| 2350510             | 2350494           | 2349961          |                    | -      | LMRG_01521 | 15                       | 35  | 121 | 229 | 333 | 259 |
|                     | 2349964           | 2349749          | 2349743            | -      | LMRG_01522 | 9                        | 16  | 66  | 151 | 253 | 197 |
| 2349647             | 2349640           | 2349452          | 2349446            | -      | LMRG_01523 | 9                        | 17  | 74  | 176 | 276 | 201 |
| 2349421             |                   |                  | 2349324            | -      | rli140     | 21                       | 37  | 155 | 320 | 485 | 368 |
| 2349221             | 2349219           | 2348260          |                    | -      | LMRG_01524 | 14                       | 31  | 124 | 280 | 402 | 324 |
|                     | 2348260           | 2347445          | 2347426            | -      | LMRG_01525 | 23                       | 56  | 206 | 437 | 620 | 485 |
| 2347425             | 2347425           | 2346499          |                    | -      | LMRG_01526 | 21                       | 46  | 163 | 359 | 509 | 389 |
|                     | 2346502           | 2346251          | 2346251            | -      | LMRG_01527 | 16                       | 39  | 144 | 295 | 426 | 344 |
| 2346250             | 2346248           | 2345724          | 2345704            | -      | LMRG_02921 | 14                       | 43  | 137 | 286 | 434 | 331 |

**Table S3**      **continued**

|         |         |         |         |   |            |     |     |      |      |      |      |
|---------|---------|---------|---------|---|------------|-----|-----|------|------|------|------|
| 2345686 | 2345676 | 2345512 | 2345512 | - | LMRG_01528 | 13  | 35  | 106  | 244  | 375  | 297  |
| 2345511 | 2345493 | 2345059 | 2345000 | - | LMRG_01529 | 15  | 41  | 146  | 278  | 412  | 304  |
| 2344909 |         |         | 2344775 | - | rliG       | 126 | 496 | 1366 | 1943 | 1944 | 1327 |
| 2344696 | 2344692 | 2343982 | 2343982 | - | LMRG_01530 | 14  | 32  | 78   | 215  | 332  | 190  |
| 2343898 | 2343898 | 2343356 |         | - | LMRG_01531 | 11  | 23  | 74   | 184  | 321  | 181  |
|         | 2343387 | 2342056 | 2342044 | - | LMRG_01532 | 8   | 19  | 55   | 150  | 263  | 145  |
| 2342043 | 2342043 | 2340553 | 2340553 | - | LMRG_01533 | 14  | 32  | 100  | 251  | 443  | 257  |
| 2340552 | 2340547 | 2339408 | 2339408 | - | LMRG_01534 | 16  | 38  | 115  | 296  | 503  | 293  |
| 2339388 | 2339329 | 2338739 |         | - | LMRG_01535 | 31  | 79  | 256  | 757  | 1343 | 807  |
|         | 2338739 | 2337738 | 2337738 | - | LMRG_01536 | 29  | 73  | 238  | 733  | 1261 | 754  |
| 2337737 | 2337719 | 2337324 |         | - | LMRG_01537 | 23  | 70  | 211  | 710  | 1235 | 755  |
|         | 2337324 | 2336962 |         | - | LMRG_01538 | 22  | 67  | 211  | 667  | 1161 | 717  |
|         | 2336962 | 2336624 |         | - | LMRG_01539 | 31  | 89  | 272  | 860  | 1490 | 914  |
|         | 2336624 | 2336217 | 2336215 | - | LMRG_01540 | 22  | 59  | 186  | 648  | 1085 | 695  |
| 2336214 | 2336214 | 2335777 | 2335777 | - | LMRG_01541 | 25  | 69  | 223  | 672  | 1132 | 729  |
| 2335776 | 2335754 | 2335515 | 2335515 | - | LMRG_01542 | 28  | 83  | 255  | 808  | 1370 | 876  |
| 2335514 | 2335460 | 2335038 | 2335038 | - | LMRG_01543 | 14  | 31  | 117  | 381  | 700  | 371  |
| 2335034 | 2335032 | 2334430 | 2334425 | - | LMRG_01544 | 12  | 30  | 100  | 317  | 591  | 309  |
| 2334419 | 2334419 | 2329056 | 2329056 | - | LMRG_01545 | 10  | 22  | 73   | 220  | 430  | 243  |
| 2329055 | 2329054 | 2328236 | 2328228 | - | LMRG_01546 | 8   | 24  | 66   | 201  | 403  | 294  |
| 2328227 | 2328227 | 2327202 |         | - | LMRG_01547 | 8   | 23  | 63   | 204  | 396  | 272  |
|         | 2327201 | 2326173 |         | - | LMRG_01548 | 7   | 20  | 54   | 168  | 334  | 242  |
|         | 2326173 | 2325100 | 2325100 | - | LMRG_01549 | 6   | 19  | 48   | 140  | 288  | 214  |
| 2325093 | 2325088 | 2324771 | 2324771 | - | LMRG_01550 | 4   | 13  | 38   | 124  | 276  | 199  |
| 2324770 | 2324766 | 2324608 | 2324590 | - | LMRG_01551 | 6   | 16  | 51   | 163  | 357  | 262  |
| 2324579 | 2324579 | 2324214 | 2324214 | - | LMRG_01552 | 3   | 11  | 33   | 109  | 241  | 197  |
| 2324213 | 2324201 | 2323920 |         | - | LMRG_01553 | 3   | 12  | 35   | 104  | 230  | 187  |

**Table S3**      **continued**

|         |         |         |         |   |            |     |     |     |     |     |     |
|---------|---------|---------|---------|---|------------|-----|-----|-----|-----|-----|-----|
|         | 2323920 | 2323069 | 2323069 | - | LMRG_01554 | 5   | 20  | 54  | 172 | 343 | 301 |
| 2322830 | 2322830 | 2322654 |         | - | LMRG_01555 | 300 | 273 | 249 | 197 | 333 | 241 |
|         | 2322667 | 2322068 | 2322068 | - | LMRG_01556 | 184 | 185 | 150 | 119 | 187 | 160 |
|         | 2321545 | 2320622 |         | - | LMRG_01557 | 2   | 2   | 2   | 2   | 3   | 0   |
| 2320365 | 2320365 | 2320132 |         | - | LMRG_01558 | 29  | 318 | 295 | 194 | 261 | 211 |
|         | 2320135 | 2319938 | 2319937 | - | LMRG_01559 | 47  | 400 | 360 | 298 | 370 | 330 |
|         | 2319659 | 2319937 | 2319937 | + | comK N'    | 7   | 16  | 10  | 7   | 5   | 4   |



**Table S4: A list of  $\phi$ 10403S nCounter probes. Related to Figure 3.**

| Gene       | Probe sequence                                                                                                                                                              |
|------------|-----------------------------------------------------------------------------------------------------------------------------------------------------------------------------|
| LMRG_01559 | TACGTCTGCTACGTAGAAAGGAAAAAGATAAAAGCTATAGAAAAGCTGTTTGCCGAATTAT<br>TTGAAACAAGAAAAGTTAAAGACCTTACAAAAGGCGTATAAAAA<br>ATAGTATTAGCAGACGCGCTTAGGCGCAATTGGTCAATAGAAGTACTGTTTTTAAAGA |
| LMRG_01558 | ACAATCATCACGTGCGATAACAAGTATGTCGTGCCTGTCCACA<br>TGGTTTAACTATGCGTTATACTTCAAAGGCAGGAACTTGGGATACTTCGGCATGGAAAG                                                                  |
| LMRG_01557 | TAGTTTCCGCCAGTACTAAAACGACAGATAAATATGCGCAG<br>GGAGTAATCGAGTTTACAAGAAGAAACGATAAATTTGTCCGGCATAACACCGGGTTTTG                                                                    |
| LMRG_01556 | ATAGTAATACTATGTTTGCTGATGGAGGGAATCAAACCTATC<br>TTTCGGAAGAAAAGCAATTGCTAGTATAAGAGAGAATTTTGCACAAATCCAAAGAT                                                                      |
| LMRG_01555 | GAACATTACTAATGACAAGAGATAA<br>TTGGGGCGCTTATCGTTCAGATAAAGGCAAGAAATTTGTGGCAAAGCGAAGGCACTT                                                                                      |
| LMRG_01554 | GGATTTGAATGGGGCGGTGATTGGTCTGGATTTGTAGACAAT<br>GTGGCTTCCGACTGTTAGCATACTTATTGGTGTCTATTCTGGGCGCATTAGCAACGTTTTT                                                                 |
| LMRG_01553 | GGATGGCTCTGGATCGCTTGAACGATGATTTGGGCAGGT<br>TATAAGTACGATGAACGAACAACAGCGATTGATGGATAGGCAAAAATGACATGATGAA                                                                       |
| LMRG_01552 | ACAGCAACAACAATCAATTGACAGCTTGTCTAAATCAGTCGGA<br>ATTGAAGAAGTTCCTGCGAATTTACGAGGTCAGGTAAAAGCAAAAGTGGATGAGTTAA                                                                   |
| LMRG_01551 | AACAAGAACAACAACGAATACAGTCAGAAGAAATAGAAGCCG<br>ACCTCCATAATAGAAAACGGCATAGCAAGAGCAATGTATTATCCGCGTTGGGATGGG                                                                     |
| LMRG_01550 | GATGATTGGGACGAAGACAAGACGAGATGGGAATTAGAAAAAC<br>AACACAAGCATTGATGTGACAATGACTGATAAAACGAATTGGAATGCAAAGAAAATA                                                                    |
| LMRG_01549 | CCGCGGGATCGCAAGCAAAAGCGGATAGTGCATTAACCTCTG<br>AACTTCGAATGTCGGCTTAAAAGCTGCTAGCGGAGGCATTTTGGTTAAGTCTGGTACGC                                                                   |
| LMRG_01548 | CAGTTTTAAACGCTACTACCGCAGAATTGAAACAAGCGGGA<br>ACACTGTTGCAGGTAATATGCAACGGCGTCTTAAGCTAGAATTACAAGACTATCCAGC                                                                     |
| LMRG_01547 | GACGACAGGAAGTGTGACCTTAAAACAATACTACGATTGTGG<br>CATTCTAAAACGCCTGGTAAAAAATATAGAGTACATCCGAGTGGCGTTGGTATTGACC                                                                    |
| LMRG_01546 | GCAAAGCGCCGGGATACGCAGATTTGACACTTGAATTTCGATG<br>ACAGCAGTGATAGGGTCTGTAGTGGCAGTTCTTTATGGCATGTATACCGCCTTCAAGGA                                                                  |
| LMRG_01545 | AAACACGGCAGGGATTAAAGGCTTTTTATCTGGTATGTGGG<br>GATGGTTTGCTTTATGATATCGACGGAAACAAGATGCCAAGCGCTACAAACAATGAGG                                                                     |
| LMRG_01544 | ATGCGGAAGAAATTGCTTCATATTCATTAACGCAAGATGCGG<br>ACTGGACAAATTGGATAAATACAACCTTAGACGAATTAGGCGAAATGACTATAAATGAT                                                                   |
| LMRG_01543 | TACGATGTCTTAATGGACAATGTCAGAGAGGCGCTCAAACAC<br>GTAACCTTCACTTCTTCAAACCCACCAAAGGCAAAAGTAAATGCTGCTGGAGTGGTTGA                                                                   |
| LMRG_01542 | AGGTGTAGCAGAAGGAACAGCAAATATTACTGTGCGCATCTA<br>GATGGGTCAGATAACACCGAAGAGCAAGGCGATTATGACGGTGATGGCAACGAAAAA                                                                     |
| LMRG_01541 | ACGTTTGTGCTAGGTTACTCAGAAGCTTACACATTCGAAGGGA<br>GAAATTAAGAACAGCGATATTAACCTGAATCGATTGCTTTGCTACTGACTCCAAATA                                                                    |
| LMRG_01540 | ACGCCAAACAAGGTTATCAAGACGGCTCTTATGAGCGGTCT<br>CCGATTAAGTACGTGTAGACCTCTCGAAAGCAAAAGGGAGCGTAAAAAAGGCGAAA                                                                       |
| LMRG_01539 | GAAAGAGGTCAGTTTGCTTTAATTAACCAAGCGGCTGCGGATA<br>CAAATCGCGGGATTATCTGATAGTGATAGATATGATGCGGTTATTTTTATTGATGCAGT                                                                  |
| LMRG_01538 | GAATAGTATGAACGTGCCAGATAACTTTATAAGTAGATCTA<br>TACAGTTAGCTACTTGTAAATCAAATCGAGTATTTCAAAGAGGCTGGCGGAACAAGTGA                                                                    |
| LMRG_01537 | GTTAGCTGTTTCTAAGCCGATAACGTATCAATCGGAAGAAC<br>AACGAACCTGCGGCGGTCATTTTCAAGGAGACGACCTTTAGACGCTTTAATGGGCAAAA                                                                    |
| LMRG_01536 | TCGCTTCTTGGTGGATGCGTTCGAGAGCAAACCTGTACTAATTT<br>ACGGTAAGGACATTACAGCTGCTAAACAACAATTATCTGAGGTGGAAGCAGAGAGAG                                                                   |
| LMRG_01535 | ATGGCTTAAAAAGCCAGCTAACACAACGGGACAAAAGATATTGA<br>CGCTTGTGGATAAAGCTAATAAGCGATGGACGCCGAATCATACTTAAACAGTAAC                                                                     |
| LMRG_01534 | TAGGACAACCGTCAACAGCGTTTATAACAGCATTGAAGACGA<br>TGTTAAAACGGCTGTTAACCTAGACGGCTCAACCACGCAGTATTTGATTCAACTGATG                                                                    |
| LMRG_01533 | AAGCATTCTTTTTATATCAAGGTGACCAAGACGACAACGGC                                                                                                                                   |

**Table S4: continued**

AGTCGCCAATGGAAATTGTCCACAAAACCTTGGGGGACAGGCTTCTATTTCTCTGGTTGT  
LMRG\_01532 GATGATCCCGCTAAACTAAAATCGATGAAAATTCCAGTCGG  
ACGATTTGCGGATGAATATATAAAATGCGGTAATGCTACAGAAGCCGCTCGCTTGGCT  
LMRG\_01531 GGTTATAGTTTGGAAACGGCTAATCGTATAGCGACCGAAAAC  
GCTAGTATAGATGAGTTGGAAATATACGAAGCCATTATAAAAAAACACAGTATATCAG  
LMRG\_01530 ATTCTAAAGTGAAGACCCAGTTGGAAAAATACAGAATAAGCA  
TATGATGATATAGCAGGAGATTGCTATGTTGCCCGGCAGAGGCTTTGTATCTGGCCACT  
rliG AGTCTCAACAGATGACGACACTTCTGTTCAATCTCATATCC  
TCAAAGTAGAAGATGCTGCAATTCATAATGTCGATAACGTTTCATGCAGCACAAGAAG  
LMRG\_01529 CGGTTAAAAAATACGATGCTATTTTGAATCAGCTTGAGCACA  
TGGGAAATGATTTCTTCACAACAGAGCCACCCCTTAATTGTGACTTAATGATTAGTAAC  
LMRG\_02921 CCGCCTTTTTCACAACAAAACGAAATAATAGAGCGTAGTTT

\* presenting only probes that worked experimentally (52 in total)

**Table S5.  $\phi$ 10403S transcriptional response during active lysogeny. Related to Figure 3.**  
Gene Expression Data Analysis generated by nSolver Analysis Software 4.0

| Gene       | RQ relative to lysogeny           |                                   |                                   |
|------------|-----------------------------------|-----------------------------------|-----------------------------------|
|            | Intracellular 2h<br>vs. Log phase | Intracellular 4h vs. Log<br>phase | Intracellular 6h vs. Log<br>phase |
| LMRG_01511 | 0.93                              | 0.57                              | 0.59                              |
| LMRG_01512 | 1.10                              | 0.99                              | 0.6                               |
| LMRG_01513 | 1.39                              | 1.13                              | 0.74                              |
| LMRG_01514 | 1.59                              | 1.5                               | 1.46                              |
| LMRG_01515 | 1.78                              | 2.19                              | 6.82                              |
| LMRG_1516  | 1.91                              | 2.25                              | 6.69                              |
| LMRG_1517  | 1.78                              | 1.96                              | 6.06                              |
| LMRG_01518 | 1.82                              | 2.08                              | 6.53                              |
| lasRNA     | 0.47                              | 0.19                              | 0.15                              |
| LMRG_2984  | 2.28                              | 1.87                              | 5.58                              |
| LMRG_02920 | 1.83                              | 1.65                              | 4.85                              |
| LMRG_01521 | 1.71                              | 1.58                              | 5.48                              |
| LMRG_01522 | 1.76                              | 1.65                              | 5.62                              |
| LMRG_01523 | 1.62                              | 1.68                              | 6                                 |
| rli140     | 2.29                              | 2.42                              | 7.74                              |
| LMRG_01524 | 1.75                              | 1.51                              | 5.3                               |
| LMRG_01525 | 1.53                              | 1.23                              | 4.74                              |
| LMRG_01526 | 1.82                              | 1.47                              | 5.72                              |
| LMRG_01527 | 1.87                              | 1.46                              | 5.79                              |
| LMRG_02921 | 2.39                              | 1.82                              | 5.97                              |
| LMRG_01529 | 1.82                              | 1.36                              | 5.64                              |
| rliG       | 0.78                              | 0.54                              | 1.23                              |
| LMRG_01530 | 2.26                              | 1.94                              | 3.86                              |
| LMRG_01531 | 2.37                              | 0.79                              | 1.21                              |
| LMRG_01532 | 2.13                              | 0.73                              | 1.04                              |
| LMRG_01533 | 1.96                              | 0.49                              | 0.76                              |
| LMRG_01534 | 1.90                              | 0.43                              | 0.81                              |
| LMRG_01535 | 0.91                              | 0.22                              | 0.32                              |
| LMRG_01536 | 0.91                              | 0.2                               | 0.26                              |
| LMRG_01537 | 0.92                              | 0.21                              | 0.29                              |
| LMRG_01538 | 0.89                              | 0.21                              | 0.24                              |
| LMRG_01539 | 0.92                              | 0.22                              | 0.31                              |
| LMRG_01540 | 0.91                              | 0.22                              | 0.27                              |
| LMRG_01541 | 0.94                              | 0.22                              | 0.27                              |
| LMRG_01542 | 1.01                              | 0.24                              | 0.36                              |
| LMRG_01543 | 0.96                              | 0.25                              | 0.32                              |
| LMRG_01544 | 1.11                              | 0.3                               | 0.41                              |
| LMRG_01545 | 1.30                              | 0.35                              | 0.67                              |
| LMRG_01546 | 1.26                              | 0.38                              | 0.63                              |
| LMRG_01547 | 1.49                              | 0.46                              | 0.72                              |
| LMRG_01548 | 2.03                              | 0.61                              | 1.05                              |
| LMRG_01549 | 1.59                              | 0.5                               | 0.89                              |
| LMRG_01550 | 1.43                              | 0.54                              | 0.98                              |
| LMRG_01551 | 1.37                              | 0.43                              | 0.63                              |
| LMRG_01552 | 1.37                              | 0.4                               | 0.62                              |
| LMRG_01553 | 1.16                              | 0.39                              | 0.64                              |
| LMRG_01554 | 1.56                              | 0.49                              | 0.73                              |
| LMRG_01555 | 1.82                              | 1.99                              | 1.63                              |
| LMRG_01556 | 2.26                              | 2.13                              | 1.74                              |
| LMRG_01557 | 1.61                              | 1.78                              | 1.08                              |
| LMRG_01558 | 14.10                             | 15.85                             | 21.69                             |

**Table S6: List of strains and mutants used in this study. Related to all Figures**

| Strain                                        | Description                                                                                                                                                                                   |
|-----------------------------------------------|-----------------------------------------------------------------------------------------------------------------------------------------------------------------------------------------------|
| XL-1 blue                                     | <i>recA1 endA1 gyrA96 thi-1 hsdR17 supE44 relA1 lac</i> [F' <i>proAB lacIqZΔMI5 Tn10 (TetR)</i> ]                                                                                             |
| SM-10                                         | Conjugation donor; F- <i>thi-1 thr-1 leuB6 recA tonA21 lacY1 supE44 (Muc+)</i> λ-[RP4-2(Tc::Mu)]<br><i>Kan<sup>R</sup> Tra+</i>                                                               |
| <i>Lm</i> 10403S                              | <i>Listeria monocytogenes</i> Wild Type, Strp <sup>R</sup> (WT)                                                                                                                               |
| <i>Bs</i> PY79                                | <i>Bacillus subtilis</i> PY79 Wild type (AES101)                                                                                                                                              |
| Δφ                                            | <i>Lm</i> 10403S cured of φ10403S (Cured strain) DPL-4056                                                                                                                                     |
| Δ <i>comK</i>                                 | <i>Lm</i> 10403S deleted of <i>comK</i> gene and cured of φ10403S                                                                                                                             |
| <i>Bs-amyE::Phs-llgA-terS</i>                 | <i>Bs</i> PY79 <i>amyE::Phs-RBS5-llgA-terS-spec</i>                                                                                                                                           |
| WT-pPL2- <i>cI</i> -like                      | <i>Lm</i> 10403S harboring pPL2 integrative plasmid constitutively expressing φ10403S CI-like repressor ( <i>LMRG_01514</i> ) under Pconst promoter (Argov et al., 2017b)                     |
| Δ <i>LMRG_01511</i>                           | <i>Lm</i> 10403S Δ <i>LMRG_01511</i> (Rabinovich et al., 2012)                                                                                                                                |
| Δ <i>LMRG_01512</i>                           | <i>Lm</i> 10403S Δ <i>LMRG_01512</i>                                                                                                                                                          |
| Δ <i>LMRG_01513</i>                           | <i>Lm</i> 10403S Δ <i>LMRG_01513</i>                                                                                                                                                          |
| Δ <i>LMRG_02918</i>                           | <i>Lm</i> 10403S Δ <i>LMRG_02918</i>                                                                                                                                                          |
| Δ <i>LMRG_01515</i>                           | <i>Lm</i> 10403S Δ <i>LMRG_01515</i>                                                                                                                                                          |
| Δ <i>LMRG_01516</i>                           | <i>Lm</i> 10403S Δ <i>LMRG_01516</i>                                                                                                                                                          |
| Δ <i>LMRG_01517</i>                           | <i>Lm</i> 10403S Δ <i>LMRG_01517</i>                                                                                                                                                          |
| Δ <i>LMRG_01518</i>                           | <i>Lm</i> 10403S Δ <i>LMRG_01518</i>                                                                                                                                                          |
| Δ <i>LMRG_02984</i>                           | <i>Lm</i> 10403S Δ <i>LMRG_02984</i>                                                                                                                                                          |
| <i>PlasRNA</i>                                | <i>Lm</i> 10403S harboring a mutated -10 site (GCTATAA→AGAGTAA) in the <i>lasRNA</i> promoter                                                                                                 |
| Δ <i>LMRG_02920</i>                           | <i>Lm</i> 10403S Δ <i>LMRG_02920</i>                                                                                                                                                          |
| Δ <i>LMRG_01521</i>                           | <i>Lm</i> 10403S Δ <i>LMRG_01521</i>                                                                                                                                                          |
| Δ <i>LMRG_01522</i>                           | <i>Lm</i> 10403S Δ <i>LMRG_01522</i>                                                                                                                                                          |
| Δ <i>LMRG_01523</i>                           | <i>Lm</i> 10403S Δ <i>LMRG_01523</i>                                                                                                                                                          |
| Δ <i>LMRG_01524-25</i>                        | <i>Lm</i> 10403S Δ <i>LMRG_01524</i> and <i>LMRG_01525</i>                                                                                                                                    |
| Δ <i>LMRG_01525</i>                           | <i>Lm</i> 10403S Δ <i>LMRG_01525</i>                                                                                                                                                          |
| Δ <i>LMRG_01526</i>                           | <i>Lm</i> 10403S Δ <i>LMRG_01526</i>                                                                                                                                                          |
| Δ <i>LMRG_01527</i>                           | <i>Lm</i> 10403S Δ <i>LMRG_01527</i>                                                                                                                                                          |
| Δ <i>LMRG_02921</i>                           | <i>Lm</i> 10403S Δ <i>LMRG_02921</i>                                                                                                                                                          |
| Δ <i>LMRG_01528</i>                           | <i>Lm</i> 10403S Δ <i>LMRG_01528</i>                                                                                                                                                          |
| Δ <i>LMRG_01529</i>                           | <i>Lm</i> 10403S Δ <i>LMRG_01529</i> ( <i>llgA</i> )                                                                                                                                          |
| Δ <i>rliG</i>                                 | <i>Lm</i> 10403S Δ <i>rliG</i>                                                                                                                                                                |
| Δ <i>LMRG_01530</i>                           | <i>Lm</i> 10403S Δ <i>LMRG_01530</i>                                                                                                                                                          |
| Δ <i>LMRG_01531</i>                           | <i>Lm</i> 10403S Δ <i>LMRG_01531</i>                                                                                                                                                          |
| Δ <i>LMRG_01535</i>                           | <i>Lm</i> 10403S Δ <i>LMRG_01535</i>                                                                                                                                                          |
| Δ <i>LMRG_01551</i>                           | <i>Lm</i> 10403S Δ <i>LMRG_01551</i>                                                                                                                                                          |
| Δ <i>LMRG_01552</i>                           | <i>Lm</i> 10403S Δ <i>LMRG_01552</i>                                                                                                                                                          |
| Δ <i>LMRG_01553</i>                           | <i>Lm</i> 10403S Δ <i>LMRG_01553</i>                                                                                                                                                          |
| Δ <i>LMRG_01554</i>                           | <i>Lm</i> 10403S Δ <i>LMRG_01554</i>                                                                                                                                                          |
| ( <i>lysis</i> )φ                             | <i>Lm</i> 10403S Δ <i>LMRG_01552</i> , <i>LMRG_01553</i> and <i>LMRG_01554</i>                                                                                                                |
| Δ <i>LMRG_01555-56</i>                        | <i>Lm</i> 10403S Δ <i>LMRG_01555</i> and <i>LMRG_01556</i>                                                                                                                                    |
| Δ <i>LMRG_01557</i>                           | <i>Lm</i> 10403S Δ <i>LMRG_01557</i>                                                                                                                                                          |
| Δ <i>LMRG_01558-9</i>                         | <i>Lm</i> 10403S Δ <i>LMRG_01558</i> and <i>LMRG_01559</i>                                                                                                                                    |
| WT-pPL2-PactA- <i>llgA</i>                    | <i>Lm</i> 10403S harboring pPL2 integrative plasmid expressing <i>llgA</i> ( <i>LMRG_01529</i> ) under the promoter of the <i>actA</i> gene                                                   |
| Δφ-pPL2-PactA- <i>llgA</i>                    | <i>Lm</i> 10403S Δφ (Cured strain) harboring pPL2 integrative plasmid expressing <i>llgA</i> ( <i>LMRG_01529</i> ) under the promoter of the <i>actA</i> gene                                 |
| ( <i>lysis</i> )φ-pPL2-PactA- <i>llgA</i>     | <i>Lm</i> 10403S ( <i>lysis</i> )φ harboring pPL2 integrative plasmid expressing <i>llgA</i> ( <i>LMRG_01529</i> ) under the promoter of the <i>actA</i> gene                                 |
| WT-pPL2-PtetR- <i>llgA-his</i>                | <i>Lm</i> 10403S harboring pPL2 integrative plasmid expressing <i>llgA</i> ( <i>LMRG_01529</i> ) tagged with C'-6His under the <i>tetR</i> inducible promoter                                 |
| Δφ-pPL2-PtetR- <i>llgA-his</i>                | <i>Lm</i> 10403S Δφ (Cured strain) harboring pPL2 integrative plasmid expressing <i>llgA</i> ( <i>LMRG_01529</i> ) tagged with C'-6His under the <i>tetR</i> inducible promoter               |
| ( <i>lysis</i> )φ-pPL2-PtetR- <i>llgA-his</i> | <i>Lm</i> 10403S Δ <i>LMRG_01552-01554</i> harboring pPL2 integrative plasmid expressing <i>llgA</i> ( <i>LMRG_01529</i> ) tagged with C'-6His under the <i>tetR</i> inducible promoter       |
| WT-φ <i>pheS</i> * <i>Km</i>                  | <i>Lm</i> 10403S with <i>pheS</i> * (mutated phenylalanyl-tRNA synthetase) and Kanamycin resistance gene inserted in the φ10403s genome downstream to <i>LMRG_01556</i> (Argov et al., 2017b) |
| <i>LMRG_01526-φp</i> <i>pheS</i> * <i>Km</i>  | <i>LMRG_01526</i> with <i>pheS</i> * (mutated phenylalanyl-tRNA synthetase) and Kanamycin resistance gene inserted in the φ10403S genome downstream to <i>LMRG_01556</i>                      |
